# Supplementary material for: Bifidobacterial Distribution Across Italian Cheeses Produced from Raw Milk
Source: Microorganisms. 2019 Nov 21;7(12):599. doi: 10.3390/microorganisms7120599 (PMC6955966; doi:10.3390/microorganisms7120599)
Supplement: Supplementary file 1 [file microorganisms-07-00599-s001.zip › Table_S1.xlsx]

## Sheet: Sheet1
Table S1: Quality filtering table of cheese included in this study.
						16S rRNA gene profiling			Bifidobacterial ITS profiling
Sample Name	Cheese Type (Italian name)	Milk Type	Use of Natural Whey	Producer	Ripening	Raw Data	Qaulity Filtered	Non-Chimeric	Raw Data	Qaulity Filtered	Non-Chimeric
Cheese 1	Mozzarella di bufala	Buffalo	Yes	A	No	51560	46212	41526
Cheese 2	Mozzarella di bufala	Buffalo	Yes	B	No	50527	46048	39219
Cheese 3	Bocconcini di bufala	Buffalo	Yes	C	No	54697	49664	44528	1867	1852	1852
Cheese 4	Toma di capra	Goat	No	D	Yes	50918	46843	44338
Cheese 5	Toma di capra	Goat	No	E	Yes	51730	46262	43583	251	245	245
Cheese 6	Toma di capra	Goat	No	F	Yes	44983	40405	39165	3899	3892	3892
Cheese 7	Ricotta di pecora siciliana	Sheep	No	G	No	46210	41852	39632
Cheese 8	Ricotta stagionata di pecora	Sheep	No	E	No	25639	23627	21664	10055	9940	8797
Cheese 9	Ricotta di bufala	Buffalo	No	B	No	44132	40483	37395	1654	1647	1647
Cheese 10	Ricotta di bufala	Buffalo	No	A	No	49373	45542	41601	3416	3400	2953
Cheese 11	Primo sale di bufala	Buffalo	No	B	No	56132	51408	50856
Cheese 12	Mozzarella di mucca	Cow	Yes	C	No	38694	35557	31484
Cheese 13	Toma di pecora siciliana	Sheep	No	H	Yes	62688	57410	51826
Cheese 14	Caciotta di bufala	Buffalo	No	A	Yes	39525	36085	32117	3060	3048	2618
Cheese 15	Caprino semistagionato	Goat	Yes	F	Yes	49221	44768	39906	7080	7069	6746
Cheese 16	Caprino morbido	Goat	Yes	F	No	39885	35664	35304	10676	10626	9838
Cheese 17	Caprino stagionato	Goat	Yes	F	Yes	52257	47191	43013
Cheese 18	Pecorino stagionato	Sheep	Yes	E	Yes	43015	38955	34711	5461	5441	5436
Cheese 19	Pecorino semistagionato	Sheep	Yes	E	Yes	42844	39075	34310	13872	13844	13321
Cheese 20	Puzzone di Moena	Cow	No	I	Yes	40197	37084	34188	4720	4714	4714
Cheese 21	Emmentaler	Cow	Yes	J	Yes	39634	36050	32250
